# Supplementary material
Source: PubMed Central journal article supplement (PMC8901421)
Supplement: NIHMS1784866-supplement-1.pdf [file NIHMS1784866-supplement-1.pdf]

**Supplemental Table**  
**Comparison of the traditional and modified**  
**versions of the Riker Sedation-Agitation Scale**

| Riker scale score           |                   |                                                                            |
|-----------------------------|-------------------|----------------------------------------------------------------------------|
| Modified scale <sup>a</sup> | Traditional scale | Corresponding level of sedation/agitation                                  |
| -3                          | 1                 | Unable to arouse: minimal or no response to noxious stimuli                |
| -2                          | 2                 | Very sedated: arouses to physical stimuli but does not follow commands     |
| -1                          | 3                 | Sedated: awakens to verbal stimuli and follows simple commands             |
| 0                           | 4                 | Calm and cooperative: awakens easily, follows commands                     |
| 1                           | 5                 | Agitated: anxious, attempts to sit up, calms down with verbal instruction  |
| 2                           | 6                 | Very agitated: does not calm, requires physical restraints                 |
| 3                           | 7                 | Dangerous agitation: pulls at tubes and catheters, strikes staff, thrashes |

<sup>a</sup> This sedation-agitation scale was developed and used at the University of California, Los Angeles.
